# Supplementary material for: Valproic Acid Monotherapy in Pregnancy and Major Congenital Malformations
Source: Atypon-hosted journal article supplement (doi:10.1056/nejmoa0907328), 2010-06-10
Supplement: nejm_jentink_2185sa1.pdf [file nejm_jentink_2185sa1.pdf]

## Supplementary Appendix

This appendix has been provided by the authors to give readers additional information about their work.

Supplement to: Jentink J, Loane MA, Dolk H, et al. Valproic acid monotherapy in pregnancy and major congenital malformations. *N Engl J Med* 2010;362:2185-93.

### Supplementary appendix, section 1

Participating registries: Belgium (Antwerp and Hainaut), Croatia (Zagreb), Denmark (Odense), France (Paris and Strasbourg), Germany (Mainz and Saxony Anhalt), Ireland (Cork & Kerry), Italy (Emilia Romagna and Tuscany), Malta, Netherlands (northern part), Norway, Poland (Wielkopolska, Poland), Spain (Basque Country), Switzerland (Vaud) and UK (Wales)

### Supplementary appendix, section 2

We searched PubMed, Web of Science and Embase for studies addressing VPA exposure in pregnancy and found over 1500 studies using the following search strategy: {"valproic acid"[Mesh] OR "epilepsy/drug therapy"[Majr] OR "antiepileptic drugs"[ti] OR "AED"[ti]} AND {"congenital abnormalities"[Majr] OR "pregnancy complications/drug therapy"[Majr] OR "birth defects"[ti]}. The criteria for selecting studies were: non-overlapping cohort studies that reported a case list with detailed information about malformations, reported the size of the VPA exposed cohort and reported the definition of the study population and the study period. Eight cohort studies met the criteria (Table 1, in de paper)[12-17, 23-24]. Authors of two studies that did not include sufficient details to categorize some malformations were contacted to obtain additional information [13,16].

In the 8 studies, malformations reported in offspring with first trimester VPA exposure were classified according to the EUROCAT congenital anomaly subgroups. The EUROCAT AED database was used as the reference group; the prevalences of various malformations in this database were calculated after excluding registrations with maternal AED exposure, maternal epilepsy, or chromosomal anomalies. Differences in prevalence between the published studies and EUROCAT reference group were compared using a chi square test with Yates' correction (Program used: S-PLUS7.0). All malformation subgroups for which the prevalence in studies of maternal VPA exposure was significantly higher than in the EUROCAT referent group (at p-value less than 0.05) were considered to be "signals" and were studied further in the case-control study (see table SA1 below).

Table SA1: Result of the review of the 8 cohort studies [12-17, 23, 24]^.

| Malformation sub group    | Literature<br>N=1,565 |            | EUROCAT<br>N=3,869,947 |            | p-value <sup>#</sup> |
|---------------------------|-----------------------|------------|------------------------|------------|----------------------|
|                           | number                | prev./1000 | number <sup>*</sup>    | prev./1000 |                      |
| spina bifida              | 22                    | 14.1       | 1933                   | 0.5        | p < 0.001            |
| microcephaly              | 2                     | 1.3        | 745                    | 0.2        | p = 0.030            |
| Ventricular septal defect | 12                    | 7.7        | 11896                  | 3.1        | p < 0.001            |
| Atrial septal defect      | 11                    | 7.0        | 8428                   | 2.2        | p < 0.001            |
| tetralogy of Fallot       | 3                     | 1.9        | 991                    | 0.3        | p = 0.001            |
| pulmonary valve atresia   | 3                     | 1.9        | 339                    | 0.1        | p < 0.001            |
| hypoplastic right heart   | 1                     | 0.6        | 99                     | 0.03       | p = 0.023            |
| cleft palate              | 13                    | 8.3        | 2338                   | 0.6        | p < 0.001            |
| diaphragmatic hernia      | 4                     | 2.6        | 766                    | 0.2        | p < 0.001            |
| Gastroschisis             | 2                     | 1.3        | 807                    | 0.2        | p = 0.041            |
| Hypospadias               | 22                    | 14.1       | 5418                   | 1.4        | p < 0.001            |
| club foot                 | 8                     | 5.1        | 3847                   | 1.0        | p < 0.001            |
| Polydactyly               | 8                     | 5.1        | 3594                   | 0.9        | p < 0.001            |
| craniosynostosis          | 5                     | 3.2        | 551                    | 0.1        | p < 0.001            |

<sup>^</sup> All specific malformations found in the literature review were defined over 75 malformation sub groups; 41 sub groups were filled with at least one case and 14 of these sub groups showed a significant increased prevalence compared with the EUROCAT population.

<sup>#</sup> calculated with a chi square test with Yate's correction

<sup>\*</sup> excluding chromosomal and AED exposed registrations

### Supplementary appendix, section 3

Table SA2: Unadjusted odds ratio's for VPA monotherapy compared with 'no AED' (first column) and 'other AED monotherapy' (second column) using non-chromosomal controls (C<sub>1</sub>) and chromosomal controls (C<sub>2</sub>). And in the last two columns the cases exposed to no AEDs and to other monotherapy.

| malformation sub group   |                                       | VPA monotherapy |                                                                  |                                                            | No VPA             |                       |
|--------------------------|---------------------------------------|-----------------|------------------------------------------------------------------|------------------------------------------------------------|--------------------|-----------------------|
|                          |                                       | exposed         | OR <sub>unadj</sub> [95%CI] <sup>#</sup><br>vs. no AED           | OR <sub>unadj</sub> [95%CI] <sup>#</sup><br>vs. other mono | No AED<br>exposure | Other mono<br>exposed |
| nervous                  | spina bifida<br>N=2,046               | 27              | C <sub>1</sub> 11.9 [7.0-19.5]<br>C <sub>2</sub> 12.2 [6.1-25.8] | 5.1 [2.3-11.6]<br>3.0 [1.0-8.9]                            | 1996               | 13                    |
|                          | microcephaly*<br>N=696                | 2               | C <sub>1</sub> 2.5 [0.3-9.7]<br>C <sub>2</sub> 2.6 [0.3-11.6]    | 1.6 [0.1-14.7]<br>1.0 [0.1-9.8]                            | 690                | 3                     |
| congenital heart disease | ventricular septal defect<br>N=11,711 | 19              | C <sub>1</sub> 1.4 [0.8-2.5]<br>C <sub>2</sub> 1.5 [0.7-3.2]     | 2.0 [0.9-4.3]<br>1.2 [0.4-3.4]                             | 11659              | 23                    |
|                          | atrial septal defect<br>N=8,267       | 19              | C <sub>1</sub> 2.0 [1.1-3.5]<br>C <sub>2</sub> 2.1 [1.0-4.6]     | 3.1 [1.3-7.1]<br>1.9 [0.6-5.5]                             | 8216               | 15                    |
|                          | tetralogy of Fallot<br>N=960          | 3               | C <sub>1</sub> 2.8 [0.6-8.6]<br>C <sub>2</sub> 2.8 [0.5-10.4]    | 1.5 [0.2-7.9]<br>0.9 [0.1-5.5]                             | 951                | 5                     |
|                          | pulmonary valve atresia<br>N=311      | 1               | C <sub>1</sub> 2.8 [0.1-16.7]<br>C <sub>2</sub> 2.9 [0.1-19.5]   | 2.4 [0.0-193.6]<br>1.5 [0.0120.7]                          | 309                | 1                     |
|                          | hypoplastic right heart<br>N=85       | 0               | C <sub>1</sub> -<br>C <sub>2</sub> -                             | -<br>-                                                     | 84                 | 1                     |
|                          | cleft palate<br>N=2,244               | 13              | C <sub>1</sub> 5.1 [2.5-9.7]<br>C <sub>2</sub> 5.3 [2.3-12.4]    | 2.9 [1.1-7.7]<br>1.7 [0.5-5.8]                             | 2215               | 11                    |
|                          | diaphragmatic hernia<br>N=754         | 2               | C <sub>1</sub> 2.3 [0.3-9.0]<br>C <sub>2</sub> 2.4 [0.3-10.7]    | 1.2 [0.1-8.9]<br>0.7 [0.1-6.1]                             | 747                | 4                     |
|                          | gastroschisis<br>N=798                | 1               | C <sub>1</sub> 1.1 [0.0-6.5]<br>C <sub>2</sub> 1.1 [0.0-7.6]     | 1.2 [0.0-24.0]<br>0.7 [0.0-15.6]                           | 794                | 2                     |
|                          | hypospadias, boys only<br>N=5,395     | 32              | C <sub>1</sub> 4.5 [2.6-7.8]<br>C <sub>2</sub> 4.9 [2.1-13.1]    | 6.6 [2.8-16.6]<br>3.3 [0.8-13.4]                           | 5343               | 11                    |
| limb                     | club foot<br>N=3,676                  | 6               | C <sub>1</sub> 1.4 [0.5-3.4]<br>C <sub>2</sub> 1.5 [0.5-4.2]     | 1.2 [0.4-3.8]<br>0.7 [0.2-2.8]                             | 3651               | 12                    |
|                          | Polydactyly<br>N=3,500                | 9               | C <sub>1</sub> 2.3 [1.0-4.7]<br>C <sub>2</sub> 2.3 [0.9-5.9]     | 5.5 [1.4-25.4]<br>3.3 [0.7-17.4]                           | 3481               | 4                     |
|                          | craniosynostosis<br>N=520             | 4               | C <sub>1</sub> 6.8 [1.8-18.8]<br>C <sub>2</sub> 7.0 [1.7-22.9]   | 4.9 [0.7-55.2]<br>2.9 [0.4-35.8]                           | 513                | 2                     |

The numbers in the table can not be summed to get the total because polytherapy is not shown (eg. spina bifida 27+1996+13=2036 plus 10 polytherapy exposed=2046)

<sup>^</sup> C<sub>1</sub>: Control group 1: all non-chromosomal, non-monogenic registrations without any of the malformations under study

C<sub>2</sub>: Control group 2: all chromosomal malformations (for exact definitions, see Methods)

\* club foot and microcephaly without spina bifida
